# Supplementary material
Source: Springer Nature journal article supplement (https://www.springermedizin.de/resource/supplementary/12871_2014_239_MOESM2_ESM.pdf/9429214)

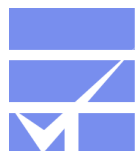

# CONSORT

TRANSPARENT REPORTING of TRIALS

## CONSORT 2010 Flow Diagram

“Blood pressure response to combined general anaesthesia / interscalene brachial plexus block for outpatient shoulder arthroscopy”

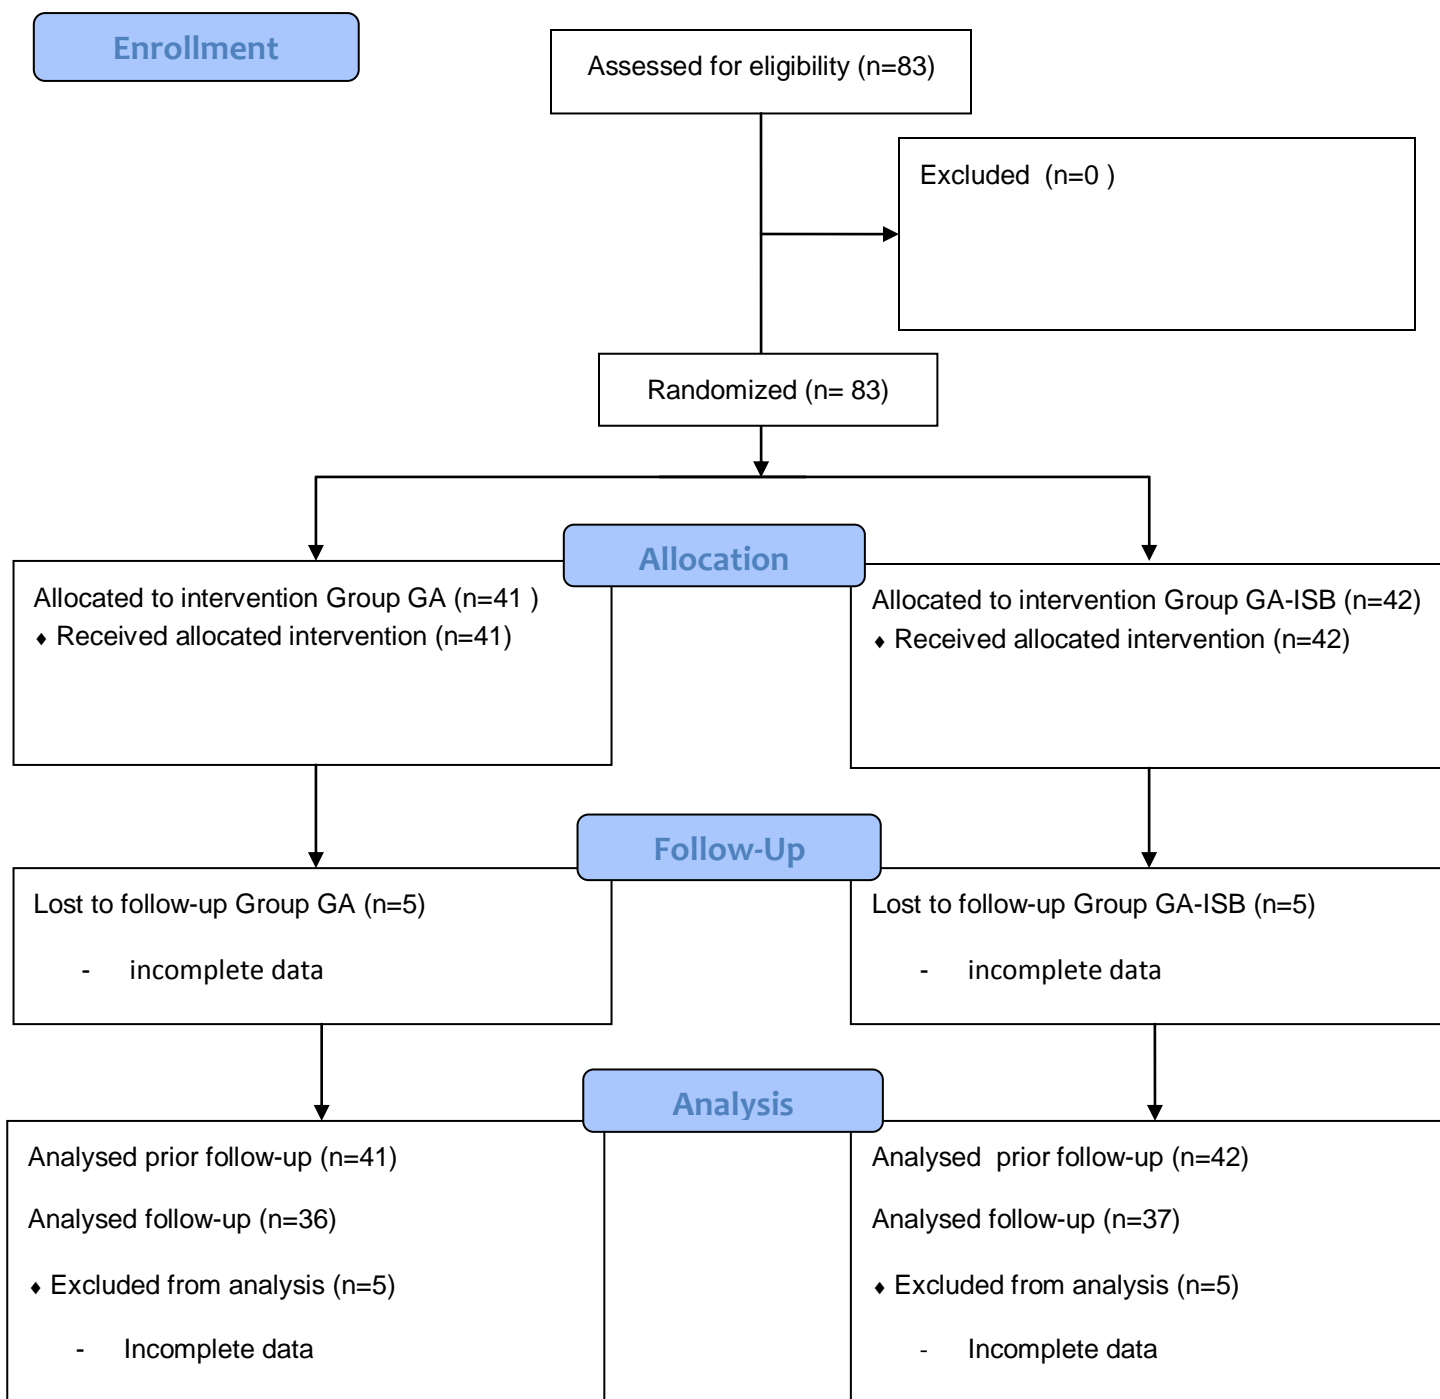

Supplement: MOESM2 [file 9429214]
